# Supplementary material for: APOBEC3G/3F mediates intrinsic resistance of monocyte-derived dendritic cells to HIV-1 infection
Source: PubMed Central journal article supplement — J Exp Med. 2006 Dec 25;203(13):2887–93. doi: 10.1084/jem.20061519 (PMC2118170; doi:10.1084/jem.20061519), 2006-12-25
Supplement: jexpmed_jem.20061519_1.pdf [file jexpmed_jem.20061519_1.pdf]

Pion et al., <http://www.jem.org/cgi/content/full/jem.20061519/DC1>**SUPPLEMENTAL MATERIALS AND METHODS****Virus stocks**

Viral physical titers were quantified in terms of HIV-1 p24<sup>gag</sup> with an ELISA kit (Beckman Coulter). LV-VSVG is a multiply deleted lentiviral vector expressing GFP (a gift of D. Trono; reference 1), whereas pHIV-VSVG is a viral genome containing the full-length genome except for a deletion in *env*, *vif*, and *nef* where GFP is cloned (a gift of D. Littman, New York University School of Medicine, New York, NY). Both lentivectors were pseudotyped by VSV-G envelope glycoprotein. pCIG3N and pCIG3B, which express the N and B-tropic versions of murine leukemia virus (MLV), Gag-Pol (a gift from J.P. Stoye, National Institute for Medical Research, London, UK), and pMSCV, an MLV-derived vector expressing GFP, were used to produce MLV-N or -B viruses. Infectious titers of GFP lentivectors or MLV stocks were evaluated on HeLa or *Mus dunni* tail fibroblast cells by following GFP expression by FACS.

**RNA interference in iDCs**

mDCs were transfected with siRNA sequences specific for the target gene using Lipofectamine 2000 (Invitrogen), according to the manufacturer's recommendations.  $0.8 \times 10^6$  HeLa-T5 $\alpha$ -HA and 293T-A3G cells and iDCs in 12-well plates were transfected with 10 nM Si-T5 $\alpha$ , 200 nM Si-A3G, 150 nM Si-A3F, or Si-Ctrl. A second round of transfection was performed 24 h later. After 72 h, gene knockdown was tested by Western blot followed by densitometry analysis (Quantity One; Bio-Rad Laboratories), and the cells were used for infection assays (see main text for a full description).

**siRNA and primer sequences**

Si-T5 $\alpha$  (siRNA1; reference 2), Si-A3G was a mix of three siRNAs targeting A3G (siA3G): Si-A3G1 (siA3G-si240; reference 3), Si-A3G2 (5'-AAGCAACCAGGCTCCACATAA, dTdT-3'), and Si-A3G3 (5'-AACCGCATCTATGATGATCAA, dTdT-3'). Si-A3F was a mix of two siRNAs targeting A3F (siA3F): Si-A3F1 (5'-TGAAGATTATGGACGATGAAGAATTTG, dTdT-3') and Si-A3F2 (5'-ACAAATTCGATGACAATTATGCATTCC, dTdT-3') or Si-Ctrl (T5 nonspecific control duplex; reference 2). Primers used for PCR or RT-PCR were as follows: primers used for sequencing were O.nef1 (5'-AG-GCAGCTGTAGATCTTAGCCACTT-3') and O.U5.1 (5'-GGTCTGAGGGATCTCTAGTTAC-3'). PCR for A3G was performed with primers GGCTCCACATAAACACGGTTTC (sense) and CCCACTCAGGTCTTGGCTGTGC (antisense). PCR for T5 $\alpha$  was performed with primers GGATAGTTCCTTCCATACTCCTTCTG (sense) and TGGTGAGCA-CAGAGTCATGG (antisense). A3F primers have been previously described (4).

**Antibodies**

The following antibodies were used: anti-HA-horseradish peroxidase (mouse clone 3F10; Roche), antitubulin (mouse clone B-5-12; Sigma-Aldrich), anti-PCNA (mouse clone AB1; Dietikon), antiactin (clone C-11; Santa Cruz Biotechnology, Inc.), anti-A3G (obtained as a gift of W.C. Greene, National Institutes of Health, Bethesda, MD), and anti-T5 $\alpha$  (ProSci).

**A3G subcellular localization**

Subcellular distribution of A3G was analyzed in control cells (HeLa, 293T-A3G-HA, and H9 cells) and primary cells, isolated from buffy coats of different healthy donors (resting T CD4<sup>+</sup> cells and monocytes). Resting T CD4<sup>+</sup> cells were activated with 2  $\mu$ g/ml PHA-P (Difco) and 200 U/ml recombinant IL-2 (Chiron), iDCs, and mDCs.

Cells were lysed with ice-cold lysis buffer (125 mM NaCl, 50 mM Hepes, pH 7.4, 0.2% NP40, 1 mM dithiothreitol, 0.1 mM PMSF, EDTA-free protease inhibitor cocktail; Sigma-Aldrich) for 30 min and centrifuged at 35,000 rpm (MC M150GX; Sorvall) for 1.5 h. SN and P were separated, and P were resuspended in a volume equal to that of supernatants and sonicated for 20 s (Sonic B12; Branson). Equal volumes of P and SN were loaded on gels and analyzed by standard Western blotting. Protein expression was quantified by densitometry analysis of specific bands. Ratios of A3G SN were calculated as a ratio of A3G SN/P, where the A3G P fraction had an arbitrary value of 1 based on densitometry analysis.

**REFERENCES**

1. Arrighi, J.F., M. Pion, M. Wiznerowicz, T.B. Geijtenbeek, E. Garcia, S. Abraham, F. Leuba, V. Dutoit, O. Ducrey-Rundquist, Y. van Kook, et al. 2004. Lentivirus-mediated RNA interference of DC-SIGN expression inhibits human immunodeficiency virus transmission from dendritic cells to T cells. *J. Virol.* 78:10848-10855.
2. Stremmlau, M., C.M. Owens, M.J. Perron, M. Kiessling, P. Autissier, and J. Sodroski. 2004. The cytoplasmic body component TRIM5 $\alpha$  restricts HIV-1 infection in Old World monkeys. *Nature.* 427:848-853.
3. Chiu, Y.L., V.B. Soros, J.F. Kreisberg, K. Stopak, W. Yonemoto, and W.C. Greene. 2005. Cellular APOBEC3G restricts HIV-1 infection in resting CD4<sup>+</sup> T cells. *Nature.* 435:108-114.
4. Peng, G., K.J. Lei, W. Jin, T. Greenwell-Wild, and S.M. Wahl. 2006. Induction of APOBEC3 family proteins, a defensive maneuver underlying interferon-induced anti-HIV-1 activity. *J. Exp. Med.* 203:41-46.
